# Supplementary material
Source: PubMed Central journal article supplement (PMC3911235)
Supplement: JB.00986-13_zjb999092971so1.pdf [file JB.00986-13_zjb999092971so1.pdf]

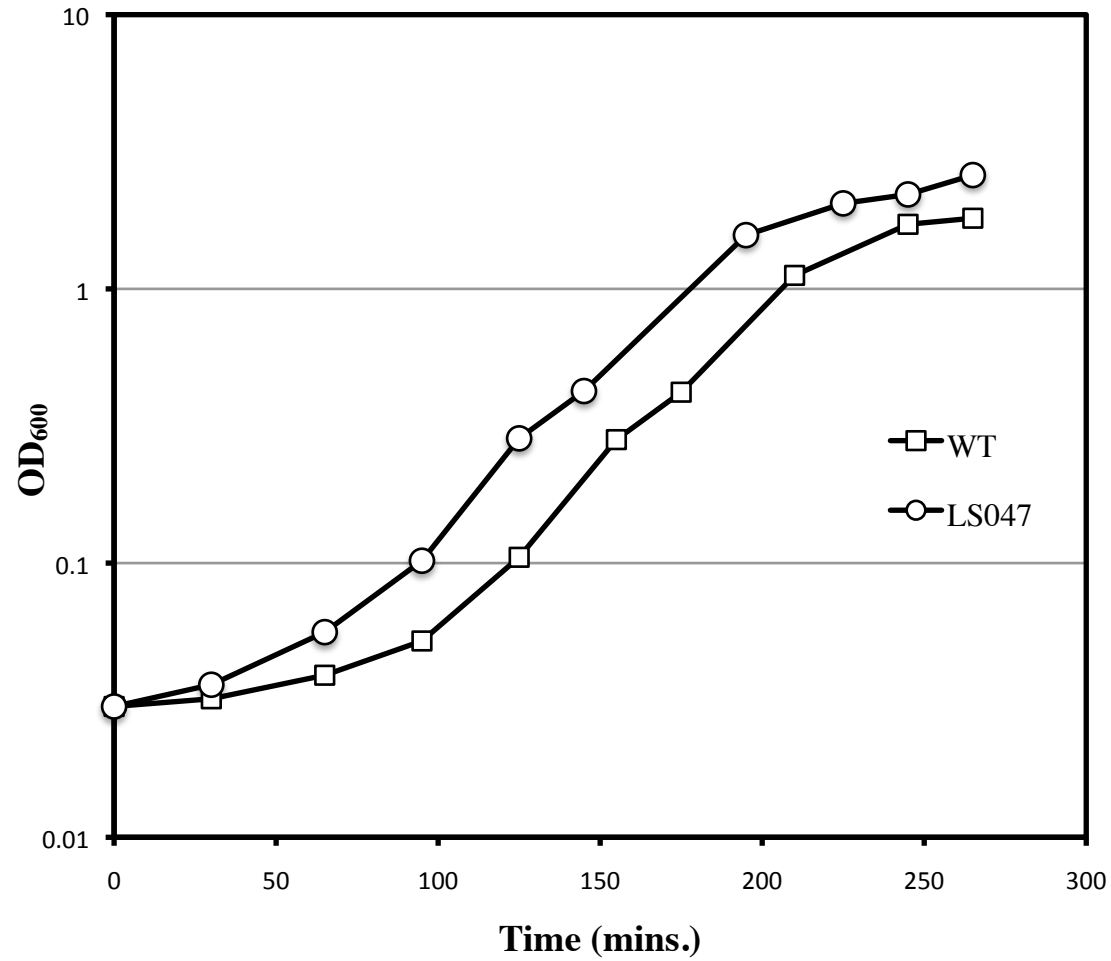

FIG. S1 Growth in LB of wild-type strain 168 (squares) and LS047 (circles). The *sigB* promoter that generates the *cwI*O antisense RNA is deleted in strain LS047. Overnight cultures of each strain were used to inoculate fresh medium to an OD<sub>600</sub> of ~0.05. This growth curve is representative of four repeats of this experiment.

**Table S1: Oligonucleotides used in this study.**

| <b>PRIMER</b>       | <b>SEQUENCE (5' → 3')</b>                         |
|---------------------|---------------------------------------------------|
| yvcEF               | CCGCGGGCTTTCCCAGCCGAAATATATGAAATATATTG            |
| yvcEdelLEADtscpR    | GTTCCTCCTTCCCACCTATGTACGAGAATCATTATAACCATC        |
| PyvcEdel1revLICtscp | GTTCCTCCTTCCCACCTTCTGGTTGTATAGCGTTTATTTC          |
| PyvcEdel2revLICtscp | GTTCCTCCTTCCCACCTCGTTCCTCATACTCTACG               |
| PyvcEdel3revLICtscp | GTTCCTCCTTCCCACCTGGAATCGTATTTTGAACATCAAG          |
| PyvcEdel4revLICtscp | GTTCCTCCTTCCCACCCCTTTTACTGTGAACCTGTCC             |
| yvcEleadlacZ F      | CCGGAATTCCGAAATATATGAAATATATTG                    |
| PyvcEdelpGhupR      | TATGTACGAGAATCATTATAACCATC                        |
| PyvcEdelpGhdwnF     | TATAATGATTCTCGTACATA TGAGGACAGGTTACAGTAAAAGG      |
| PyvcEdelpGhdwnR     | CCCAAGCTT CAATCTTTGATTGATTTTCC                    |
| DPSyvcEUPF          | CGGAATTCGCTTTTTCGACGAAGCAAAAAGC                   |
| DPSyvcEUPR          | TGCTTTTGATGATTCAGTTGTCG                           |
| DPSyvcEdwnF         | CGACAACCTGAATCATCAAAAAGCA GGCGGCACTGTTATCAGCAACTC |
| DNPSyvcEdwnR        | CCCAAGCTTCGTTT TAGGAAAGTACCGTTTCC                 |

|                       |                                                       |
|-----------------------|-------------------------------------------------------|
| DNTyvceUPF            | CGGAATTCTTTACATATGATGTGAAATAAACGC                     |
| DNTyvceEUPR           | AATGCTGGAAGCAACCTCAGATTGC                             |
| DNPSyvceEdwnF         | GCAATCTGAGGTTGCTTCCAGCATT GGCGGCACTGTTATCAGCAACTC     |
| DNPSyvceEdwnR         | CCCAAGCTTCGTTTAGGAAAGTACCGTTTCC                       |
| cw1ON1delUPFb         | ACGTTTCAGAGGATGCACTTTTCGC                             |
| cw1ON1delDWNrb        | TACGAATGATGAGCAGTCAAAAATACG                           |
| cw1ON1delUPR          | TATATTCTAGGAAGTAGGTATTCACAATGCTGGAAGCAACCTCAGATTGC    |
| cw1ON1delDWNF         | TATATTATGTAAACTAATATGCAAGCTGAAAAAAGAGATTAAAGAACTGAAGC |
| cw1ON3delUPFb         | CATCATTCCCTCGTAGAGTATGAGG                             |
| cw1ON3delDWNrb        | GTGTATACAGCGGCCGTCATCC                                |
| cw1ON3delUPR          | TATATTCTAGGAAGTAGGTATTCACCGCTTTAGCCGTTTTCTTTTGGCT     |
| cw1ON3delDWNF         | TATATTATGTAAACTAATATGCAAGACTGAATCATCAAAGCAAGCTCATC    |
| yvcEprobefwd          | AATTACACTTGGTTTGGCTTCCG                               |
| yvcEproberev(T7)      | TAATACGACTCACTATAGGGAGTCACCAAAGCTTGTTGATCC            |
| ASprobefwd(T7)        | TAATACGACTCACTATAGGGGCGTTGGTTCAAGCATTGTAGG            |
| ASproberev            | GAGCCTTCTGTTTATAGAAGGC                                |
| yvcEASpromterupfwd(B) | CGCGGATCCGTGTTAACCTTGGACCTGTAGGC                      |

|                       |                                                                   |
|-----------------------|-------------------------------------------------------------------|
| yvcEASpromteruprev    | GTTAATAAAGAAAGAGCCTTCTG                                           |
| yvcEASpromterdofwd    | CAGAAGGCTCTTTCTTTATTAACGAGCAAAAAAATAGCGTATCACC                    |
| yvcEASpromterdorev(H) | CCCAAGCTTCCAAGGATACTTTCGAATCCAGG                                  |
| yvcEASSP1             | GGACAATCTCCGTACAAGTTTGGCG                                         |
| yvcEASSP2             | CACTCAGTCTGATATCAACAACCG                                          |
| yvcEASSP3(B)          | CGCGGATCCTGACTGCTCATTCGTACGCTGG                                   |
| yvcE5'fwd(NdeI)       | GGAATTCCATATGAAAATCGAAAGCAAGCAATCTGAG                             |
| yvcEpET3'             | CCGCTCGAGTTGAACAACACGTCTTACAACACC                                 |
| lytEupfwd             | AACGGTAGGCTCTTATGTAAGGC                                           |
| lytEdorev             | GTATTTGCCGTATGCGCTCAGGC                                           |
| catdiffwd             | GTGAATACCTACTTCCCTAGAATATATATTATGTAAACTCGGCAATAGTTACCCTTATTATCAAG |
| catdiffrev            | CTTGCAATATTAGTTTACATAATATATATTCTAGGAAGTATCGGTGATGTCGGCGATATAGGC   |
| yvcEPE4               | GGATCAAAAAACTGCTTGTCC                                             |
| yvcEPE5               | AGCAACCTCAGATTGCTTGC                                              |
| yvcePE7               | GGAAGCCAAACCAAGTGTAAATTAAC                                        |
